# Supplementary material for: GABA induces a hormonal counter-regulatory response in subjects with long-standing type 1 diabetes
Source: PubMed Central journal article supplement (PMC8506884; doi:10.1136/bmjdrc-2021-002442), 2021-10-11
Supplement: bmjdrc-2021-002442supp001.pdf [file bmjdrc-2021-002442supp001.pdf]

**Supplementary Table 1**

During treatment with the medium- and high dose (600 mg and 1,200 mg) four out of six subjects reported mild and transient adverse events (AEs). In the table all reported AEs are listed and classified. None of the six subjects in the trial had a serious adverse event and there were no AEs during treatment with the low dose (200 mg).

| Subject No. | Causal relationship to study drug | Maximum AE intensity | Description     |
|-------------|-----------------------------------|----------------------|-----------------|
| 1           | Possibly related                  | Mild                 | Dizziness       |
| 1           | Probably related                  | Mild                 | Flushing        |
| 1           | Possibly related                  | Mild                 | Flatulence      |
| 1           | Probably related                  | Mild                 | Flushing        |
| 1           | Probably related                  | Mild                 | Flushing        |
| 1           | Possibly related                  | Mild                 | Dizziness       |
| 4           | Probably related                  | Mild                 | Flushing        |
| 4           | Possibly related                  | Mild                 | Palpitations    |
| 4           | Probably related                  | Mild                 | Flushing        |
| 4           | Probably related                  | Mild                 | Hypoesthesia    |
| 4           | Probably related                  | Mild                 | Hypoesthesia    |
| 4           | Probably related                  | Mild                 | Hypoesthesia    |
| 4           | Probably related                  | Mild                 | Flushing        |
| 4           | Probably related                  | Mild                 | Palpitations    |
| 4           | Probably related                  | Mild                 | Paraesthesia    |
| 5           | Unlikely related                  | Mild                 | Nasopharyngitis |
| 5           | Unlikely related                  | Mild                 | Epistaxis       |
| 10          | Possibly related                  | Mild                 | Presyncope      |
| 10          | Possibly related                  | Mild                 | Fatigue         |
| 10          | Possibly related                  | Mild                 | Fatigue         |
| 10          | Possibly related                  | Mild                 | Fatigue         |
| 10          | Possibly related                  | Mild                 | Fatigue         |
| 10          | Possibly related                  | Mild                 | Fatigue         |
